# Supplementary material for: An update on the 4D-LETKF data assimilation system for the whole neutral atmosphere
Source: Copernicus journal article supplement (doi:10.5194/gmd-15-2293-2022), 2022-03-17
Supplement: Supplementary file [file gmd-15-2293-2022-supplement-title-page.pdf › gmd-15-2293-2022-supplement-title-page.pdf]

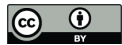

## *Supplement of*

# **An update on the 4D-LETKF data assimilation system for the whole neutral atmosphere**

**Dai Koshin et al.**

*Correspondence to:* Dai Koshin ([koshin@eps.s.u-tokyo.ac.jp](mailto:koshin@eps.s.u-tokyo.ac.jp))

- [gmd-15-2293-2022-supplement-title-page.pdf](#)
- [koshin2021-letkfcode](#)
  - [SFMT.f90](#)
  - [averaging\\_kernel.f90](#)
  - [common.f90](#)
  - [common\\_letkf.f90](#)
  - [common\\_miroc.f90](#)
  - [common\\_mpi.f90](#)
  - [common\\_mpi\\_miroc.f90](#)
  - [common\\_mpi\\_serial.f90](#)
  - [common\\_mtx.f90](#)
  - [common\\_obs.f90](#)
  - [common\\_obs\\_miroc.f90](#)
  - [common\\_tvs\\_miroc.f90](#)
  - [letkf.f90](#)
  - [letkf\\_obs.f90](#)
  - [letkf\\_tools.f90](#)
  - [mod\\_adm.f90](#)
  - [mod\\_vbc.f90](#)
  - [myvbc.f90](#)
  - [solar.f90](#)
  - [ssmis\\_fwd.f90](#)
  - [ssmis\\_operator.f90](#)
- [supplement.pdf](#)

The copyright of individual parts of the supplement might differ from the article licence.
